# Supplementary material for: Silk nanofibers-ZIF hybrid membrane with improved treatment efficiency and highly enhanced water permeability for excellent removal of multiple pollutants from water
Source: Royal Society of Chemistry journal article supplement (doi:10.1039/d1en00798j), 2021-01-01
Supplement: d1en00798j1.pdf [file d1en00798j1.pdf]

Electronic Supplementary Material (ESI) for Environmental Science: Nano

*This journal is © The Royal Society of Chemistry 2021*

**Silk nanofibers-ZIF hybrid membrane with improved treatment efficiency and highly enhanced water permeability for excellent removal of multiple pollutants in water**

*Dina Sun, Gengping Meng, Shihao Sun, Wenting Guo, Jun Hai\*, Junxia Su, Yanxia Song, Fengjuan Chen\*, Baodui Wang\**

State Key Laboratory of Applied Organic Chemistry and Key Laboratory of Nonferrous Metal Chemistry and Resources Utilization of Gansu Province, Lanzhou University, Lanzhou, 730000,  
P. R. China

\*Email: haij@lzu.edu.cn; chenfj@lzu.edu.cn; wangbd@lzu.edu.cn

## **Experimental section.**

**Materials and Chemicals.** All reagents and solvents were obtained commercially and used without further purification unless otherwise noted. Silk cocoons were purchased from the Alibaba Group and factory wastewater used in the experiment from a sewage treatment plant (Jinchuan Group Ltd., China). Zinc nitrate hexahydrate ( $\text{Zn}(\text{NO}_3)_2 \cdot 6\text{H}_2\text{O}$ , 98%), copper sulfate ( $\text{CuSO}_4$ ), lead acetate ( $\text{Pb}(\text{Ac})_2$ ), cadmium nitrate ( $\text{Cd}(\text{NO}_3)_2$ ), mercuric acetate ( $\text{Hg}(\text{Ac})_2$ ), hydrochloric acid ( $\text{HCl}$ , 37%), sodium carbonate ( $\text{Na}_2\text{CO}_3$ ), sodium sulfate ( $\text{Na}_2\text{SO}_4$ ), sodium nitrite ( $\text{NaNO}_2$ ), sodium hydroxide ( $\text{NaOH}$ ), and ethanol ( $\text{EtOH}$ ,  $\geq 99.7\%$ ) were provided by Lianlong Tianjin Pharmaceutical Chemical Co. Ltd. Lithium bromide ( $\text{LiBr}$ ), 2-methylimidazole ( $\text{Hmim}$ , 99%), Congo red, rhodamine B and methylene blue were from Aladdin reagents. Deionized (DI) water was used in all experiments.

**Characterizations.** The structural details of SNFs were characterized by transmission electron microscope (TEM, FEI, Talos 200s). The morphology of SNFs-ZIF membrane was imaged by using a field emission scanning electron microscope (FE-SEM, FEI, Sirion 200). The chemical properties of the SNFs-ZIF were characterized by Fourier transform infrared spectrometer (FT-IR, Nicolet, FT-170SX), X-ray powder diffraction (XRD, AXS D8-Advanced diffractometer) and X-ray photoelectron spectroscopy (XPS, a PHI5702 multifunctional spectrometer). An energy-dispersive X-ray (EDX) spec

troscope attached to the FE-SEM was utilized to analyze the element distributions in the cross section of SNFs-ZIF. UV-vis absorbance measurements (UV-vis, Shimadzu, UV-1750) were used to evaluate the treatment efficiency for organic dyes of the membrane and the content of  $\text{NO}_2^-$ -N and  $\text{NH}_4^+$ -N in wastewater. The concentrations of  $\text{Cu}^{2+}$ ,  $\text{Pb}^{2+}$ ,  $\text{Pd}^{2+}$  and  $\text{Cd}^{2+}$  in water were measured by inductively coupled plasma mass spectrometry (ICP-MS, PerkinElmer Elan DRC II). While,  $\text{Hg}^{2+}$  was measured by atomic fluorescence spectroscopy (AFS). Electrochemical properties of the carbonized membrane were tested by an electrochemical station (CHI760E, Shanghai Chenhua Ltd.). Ion Chromatography (ICG, 1500) was used to determine the content of  $\text{NO}_3^-$ -N in wastewater.

### **Filtration Experiments.**

All filtration experiments are carried out in a filter device with an effective membrane area of  $12\text{ cm}^2$  and a pressure of  $0.8\text{ bar}^{-1}$ . The schematic diagram of SNFs-ZIF hybrid membranes fabrication is depicted in Figure S1. The SNFs-ZIF hybrid membranes were further obtained by depositing SNFs-ZIF dispersions on PC substrate through vacuum-assisted filtration. Several kinds of typical heavy metal ions in industrial wastewater were selected to evaluate the removal performance of the SNFs-ZIF hybrid membranes, including  $\text{Cu}^{2+}$ ,  $\text{Pb}^{2+}$ ,  $\text{Cd}^{2+}$  and  $\text{Hg}^{2+}$ , which were prepared by dissolving  $\text{CuSO}_4$ ,  $\text{Pb}(\text{Ac})_2$ ,  $\text{Cd}(\text{NO}_3)_2$  and  $\text{Hg}(\text{Ac})_2$  salts in DI water, respectively. The ion concentration was measured by ICP-MS and AFS, then the removal efficiency was calculated according to the formula (1):

$$\text{Removal efficiency (\%)} = 100 \times (C_0 - C) / C_0 \quad (1)$$

where  $C_0$  and  $C$  are the concentrations of metal ions before and after the SNFs-ZIF hybrid membranes treatment, respectively. Water flux was calculated according to formula (2)

$$Q = V / (T \times A \times P) \quad (2)$$

Among them,  $V$  is the volume of treated solution (L),  $T$  is the time of solution flowing through the membrane (h),  $A$  is the effective area ( $\text{m}^2$ ) of the membrane, and  $P$  is the operating pressure (bar).  $Q$  represents water flux at unit pressure ( $\text{L} \cdot \text{m}^{-2} \cdot \text{h}^{-1} \cdot \text{bar}^{-1}$ ). The analysis method of the actual sample of factory wastewater after membrane filtration is consistent with the solution prepared in the laboratory. Additionally, congo red, rhodamine B and methylene blue were dissolved in DI water (50 ppm) to evaluate the performance of the membrane for removing organic dyes from wastewater. The contents of three organic dyes in the water before and after filtration were determined by UV-vis spectroscopy.

**Preparation of composite Electrode.** Thermal reduction process was employed to reduce the palladium ions into the nanoparticles whilst converting the SNFs-ZIF membrane into the carbonized membrane (CM). The membrane (105  $\mu\text{m}$ ) with protein content of 6.7wt % was utilized for vacuum-assisted filtration of 0.5 M  $\text{PdCl}_2$  solution (50 mL). Then, the film containing  $\text{PdCl}_2$  was dried in an oven at 40  $^\circ\text{C}$  for 12 h. Pd/CM powder was obtained by calcining the dried film at 500  $^\circ\text{C}$  for 3 h in a tubular furnace.

Next, 10  $\mu\text{L}$  nafion solution was added into 2  $\text{mg}\cdot\text{mL}^{-1}$  Pd/CM suspension (2 mL) to make the composite easy to deposit on carbon paper (CP, 1.0 cm  $\times$  1.0 cm). Pd/CM suspension of 250  $\mu\text{L}$  was drawn to deposit on both sides of carbon paper, which was finally fastened in glassy carbon electrode (GCE) clamp for as working electrode.

**Electrocatalytic Reduction of  $\text{NO}_3^-$ -N.** Composite electrodes (1.0 cm  $\times$  1.0 cm), platinum sheet (1.0 cm  $\times$  1.0 cm) and saturated calomel electrodes were used in an electrochemical cell divided with a proton exchange membrane as the working electrode, counter electrode, and reference electrode, respectively. The working electrode was prepared by mixing 2  $\text{mg}\cdot\text{mL}^{-1}$  catalyst (dispersed in mixed solvent of ethanol and DI water) and 0.5% Nafion solution to form a homogeneous dispersion. The dispersion (500  $\mu\text{L}$ ) was then modified the carbon paper (1  $\times$  1 cm) by drop-coating which was acted as the cathode. The cathode cells contained 27 mL of 0.5  $\text{mol}\cdot\text{L}^{-1}$   $\text{Na}_2\text{SO}_4$  and 3 mL sodium nitrate stock solution (50  $\text{mg}\cdot\text{L}^{-1}$   $\text{NO}_3^-$ -N), while anode cells contained 30 mL  $\cdot\text{Na}_2\text{SO}_4$  (0.5  $\text{mol}\cdot\text{L}^{-1}$ ). Electrocatalytic reduction of  $\text{NO}_3^-$ -N tests were performed on a CHI 760E electrochemical analyzer system at  $-1.3$  V (vs. SCE) for 60 h. The nitrate conversion was calculated by the equations (3):

$$\text{Conversion (\%)} = (C_0 - C_t) / C_0 \times 100 \quad (3)$$

Where  $C_0$  is the initial concentration ( $\text{mg}\cdot\text{L}^{-1}$ ) of  $\text{NO}_3^-$ -N,  $C_t$  is the concentration ( $\text{mg}\cdot\text{L}^{-1}$ ) of  $\text{NO}_3^-$ -N at time t. The nitrate removal capacity was used to evaluate the

catalytic activity in unit weight of the material, which was calculated using the following equation:

$$RC = (C_0 - C_t) V/m \quad (4)$$

where V (L) is the volume of the nitrate solution and m (g) is the mass of nanocomposites coated on carbon papers. The selectivity for N<sub>2</sub> was evaluated using the equation (5):

$$S (\%) = \frac{\Delta(\text{NO}_3^- - \text{N}) - \Delta(\text{NH}_4^+ - \text{N}) - \Delta(\text{NO}_2^- - \text{N})}{\Delta(\text{NO}_3^- - \text{N})} \times 100 \quad (5)$$

where  $\Delta(\text{NO}_3^- - \text{N})$ ,  $\Delta(\text{NH}_4^+ - \text{N})$ , and  $\Delta(\text{NO}_2^- - \text{N})$  are the changes of nitrate, ammonium and nitrite concentration before and after the reaction, respectively. Energy consumption (EC) was determined according to the equation (6):

$$EC = \frac{VAt}{J\Delta(\text{NO}_3^- - \text{N})} \times 10^{-3} \quad (6)$$

Among them, V stands for potential (V), I is the current (A), and J is the volume of the solution (m<sup>3</sup>).

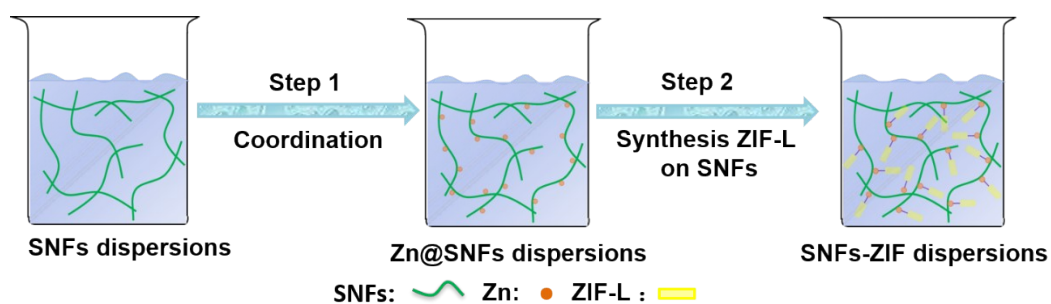

**Figure S1.** Diagrammatic sketch of the synthesis of SNFs-ZIF hybrid materials.

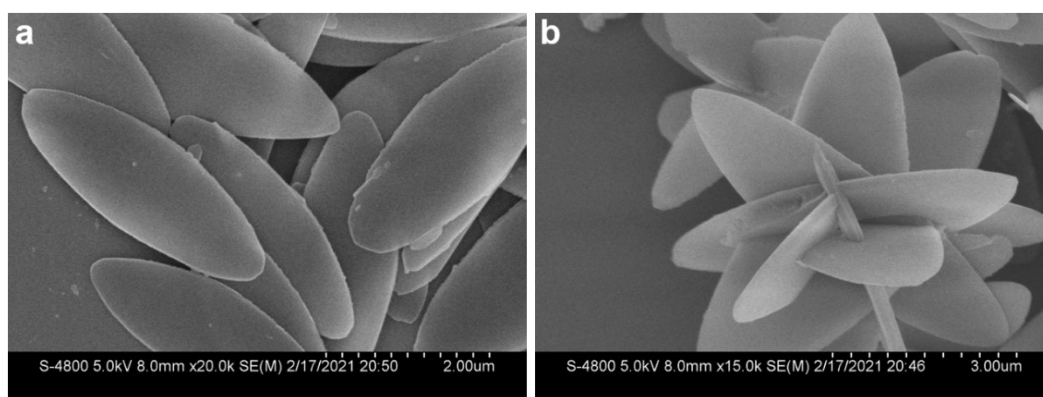

**Figure S2.** SEM images of typical ZIF-L crystals: (a) top view image showing leaf-like shape and (b) side view image indicating the crystal thickness.

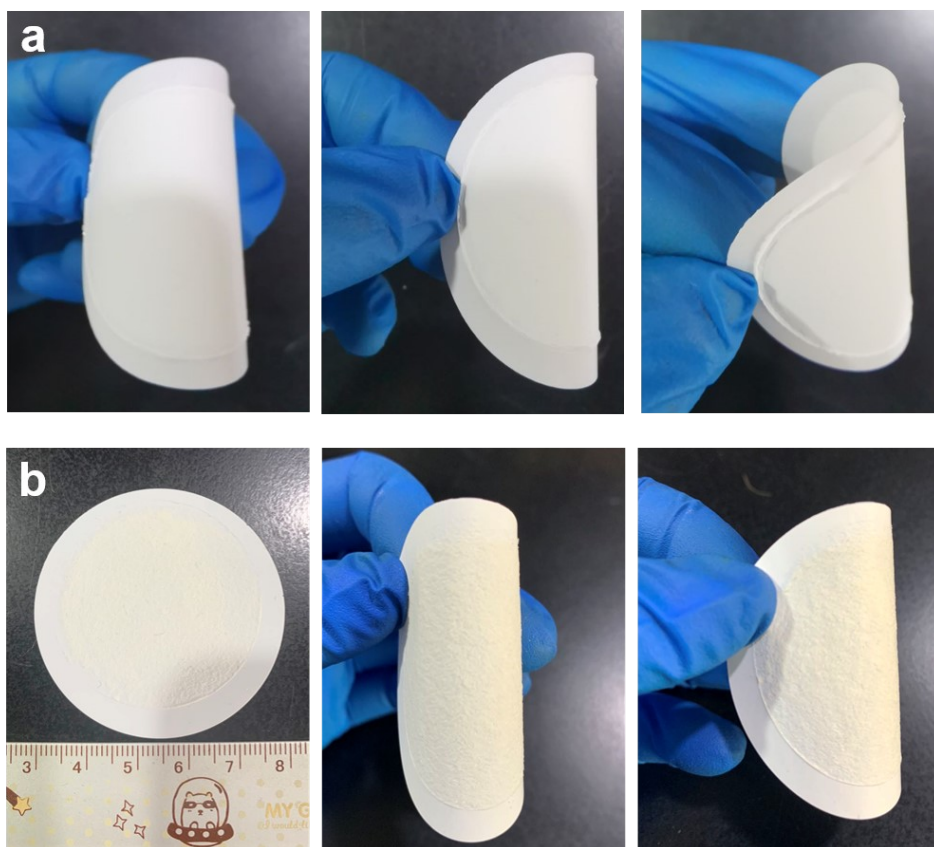

**Figure S3.** (a) The photos of the SNFs-ZIF hybrid membrane, indicating the film can bend freely without cracks. (b) The photos of the pure SNFs membrane demonstrate the discontinuous fluffy particles in surface, which are easily broken.

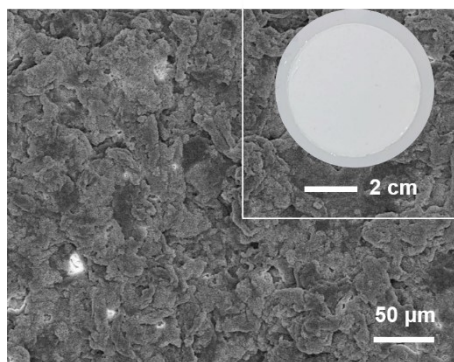

**Figure S4.** SEM image of the membrane surface. Insert: the macrophotograph of membrane surface.

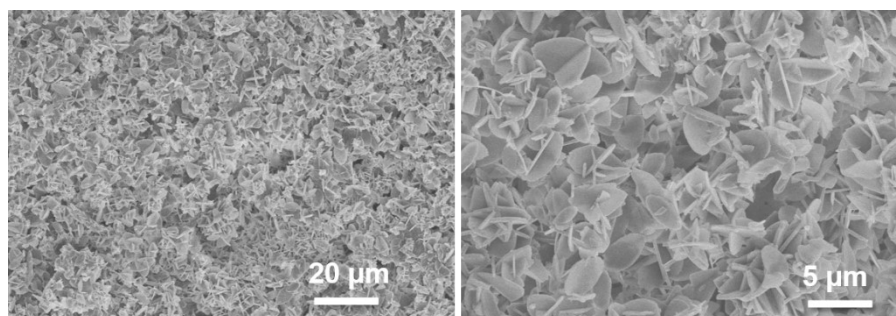

**Figure S5.** SEM images of the SNFs-ZIF hybrid material.

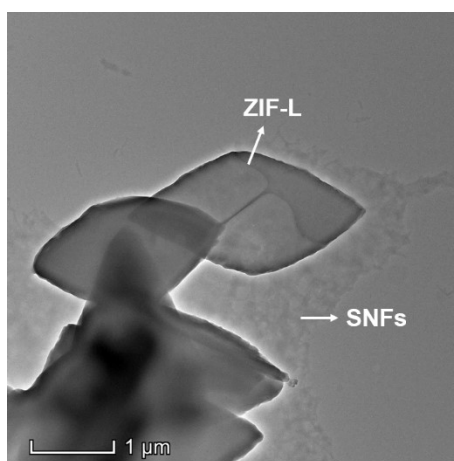

**Figure S6.** TEM images of the SNFs-ZIF hybrid material.

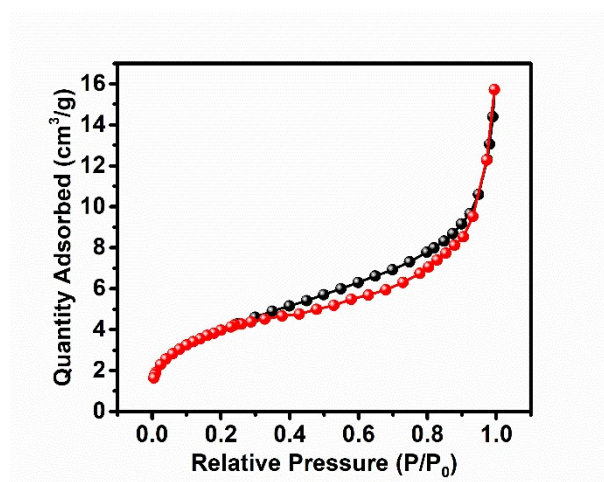

**Figure S7.** N<sub>2</sub> adsorption-desorption isotherms of SNFs-ZIF hybrid membrane.

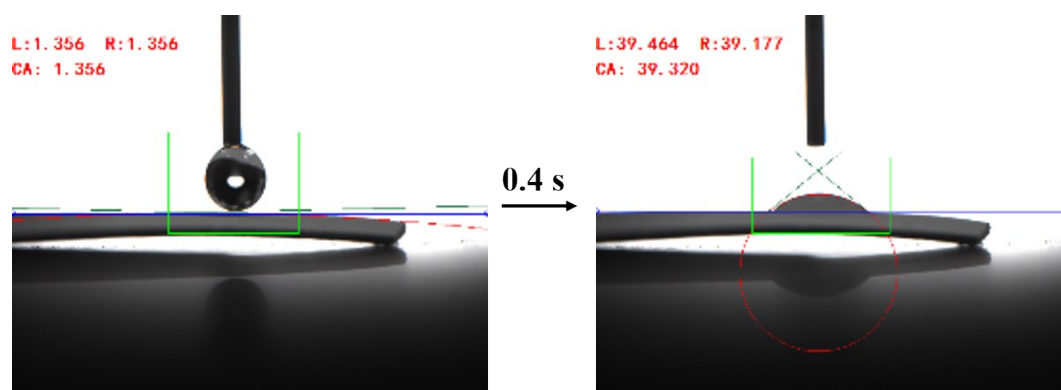

**Figure S8.** Water contact angle of SNFs-ZIF hybrid membrane.

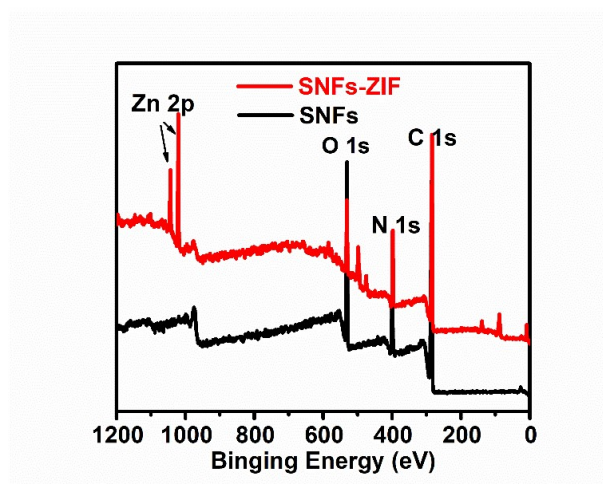

**Figure S9.** The full XPS spectrum of the SNFs (blank) and the SNFs-ZIF membrane (red). The characteristic peaks of Zn 2p appear in the SNFs-ZIF spectrum, further verifying the successful preparation of SNFs-ZIF.<sup>1</sup>

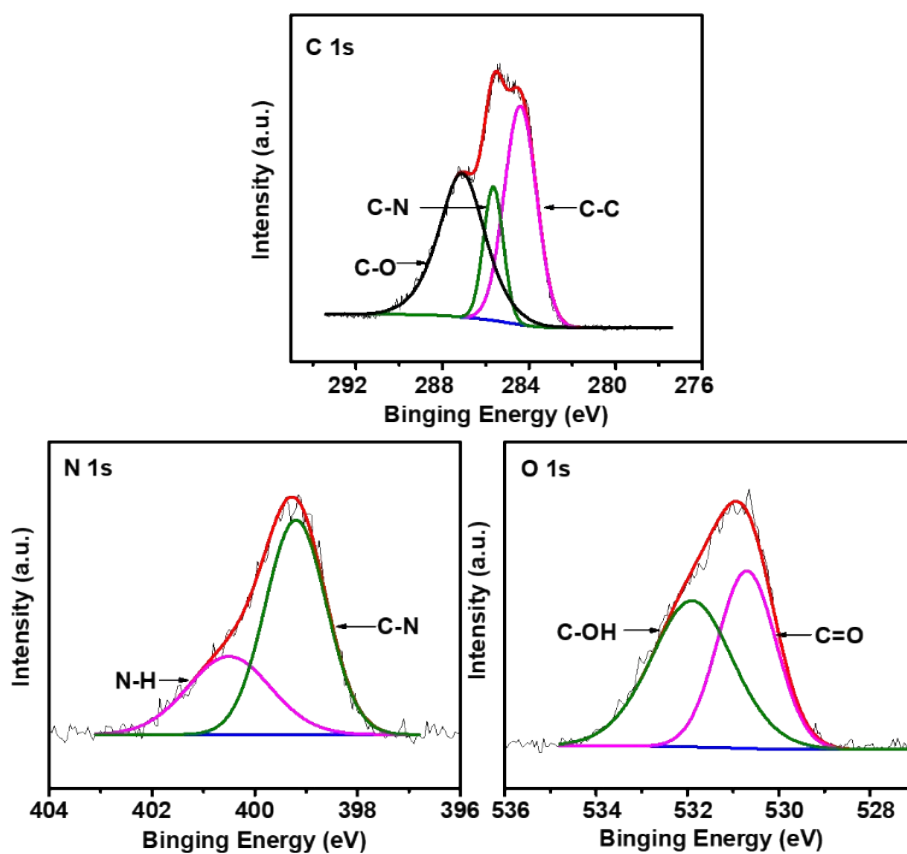

**Figure S10.** The high-resolution spectra of C, O, and N in SNFs. N 1s is fitted to two peaks, namely C–N and N–H are significant characteristic peaks at 399.2 eV and 400.5 eV, respectively. O 1s is also fitted to two peaks, located at 531.9eV (C–O) and 530.7eV (C=O).<sup>2</sup>

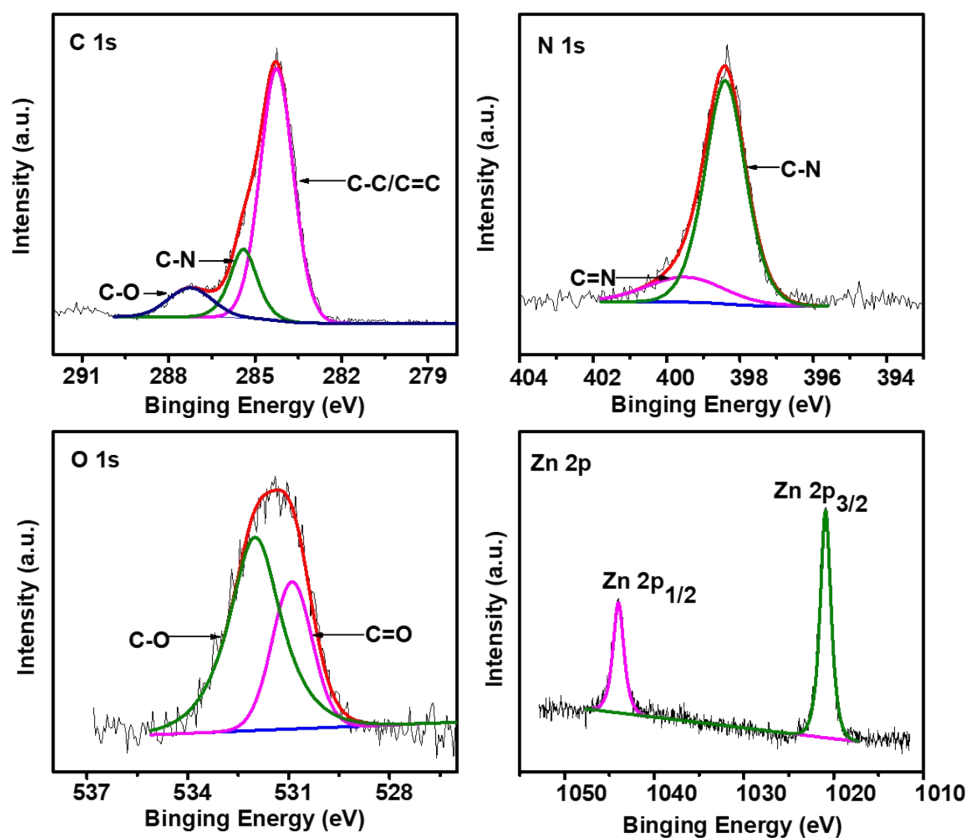

**Figure S11.** XPS spectrum fitting of the SNFs-ZIF hybrid membrane. The N 1s XPS spectrum give two peaks, centered around 399.5 eV and 398.4 eV, corresponding to C=N in 2-methyl-imidazole and C-N, respectively. The O 1s peak is deconvoluted into two peaks at 532.2 eV and 530.9 eV, which were attributed to C-O and C=O, respectively. While the Zn 2p<sub>3/2</sub> and 2p<sub>1/2</sub> peaks locate at 1020.9 eV and 1044.1 eV, showing consistence with previous reports.<sup>1,2</sup>

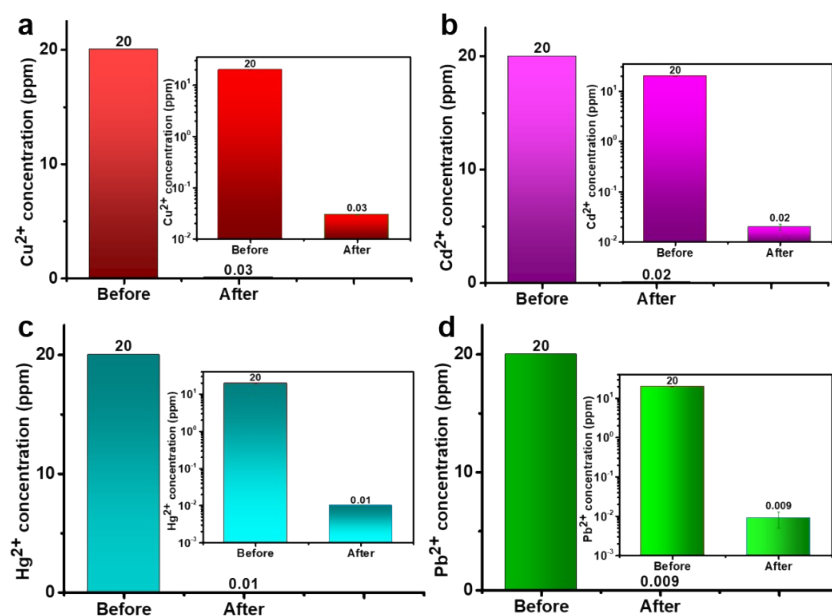

**Figure S12.** The concentration changes before and after filtration via the SNFs-ZIF membrane.

Inner illustration: more intuitive demonstration of magnitude order after  $\text{Cu}^{2+}$  (a),  $\text{Cd}^{2+}$  (b),  $\text{Hg}^{2+}$  (c), and  $\text{Pb}^{2+}$  (d) were filtered.

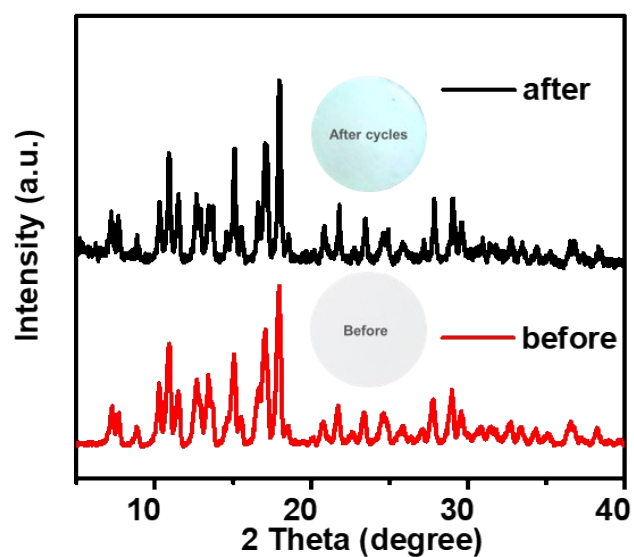

**Figure S13.** XRD spectra after the cycle and before the filtration. Inset: Digital photos of membrane

before and after circulating filtration.

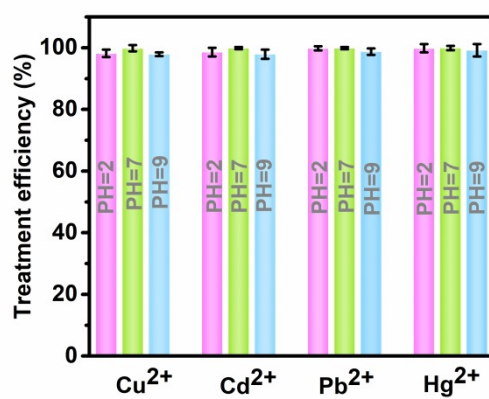

**Figure S14.** Treatment efficiency of the SNFs-ZIF hybrid membrane on four kinds of heavy metal ions (20 ppm, 30 mL) under different pH conditions. Different pH was regulated by 1M HNO<sub>3</sub> and 1M NaOH.

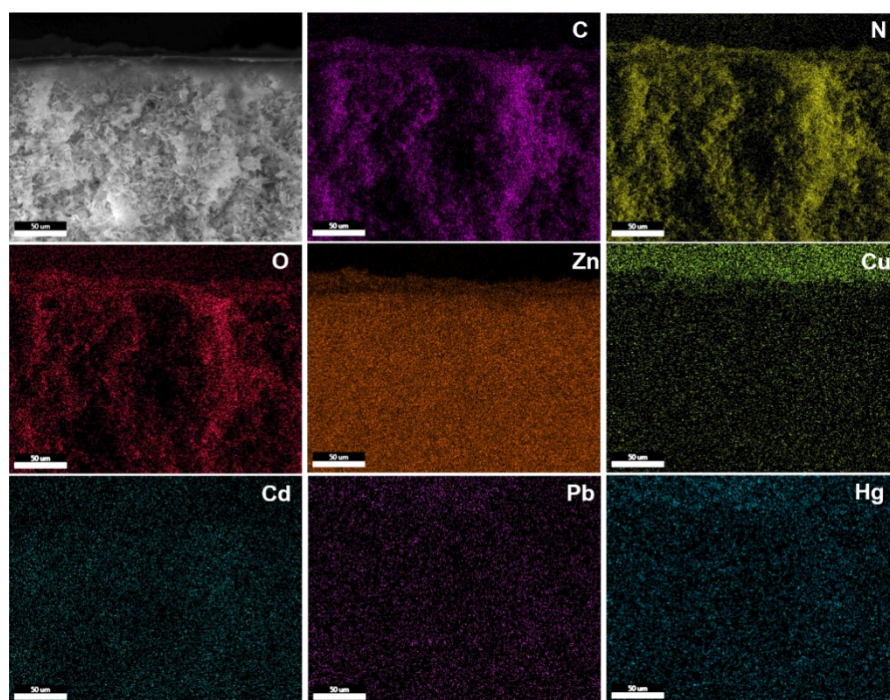

**Figure S15.** EDX mapping of the elemental distribution.

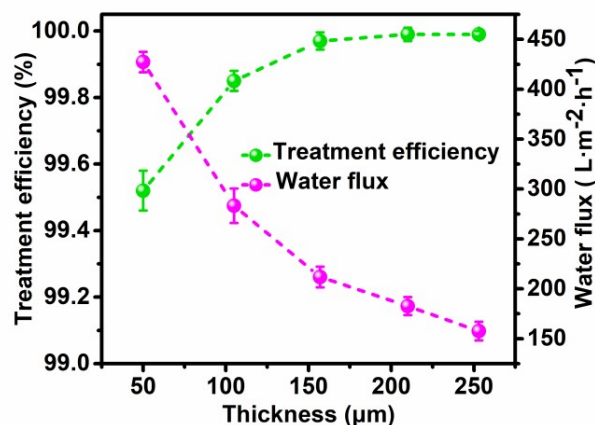

**Figure S16.** The effect of membrane thickness on the treatment efficiency and flow rate. The results indicated that with the increase of film thickness, the treatment efficiency of the film on copper ions increases to over 99.9%, and then tended to be stable. As expected, the membrane flux decreased with the increase of membrane thickness. Considering the water flow rate and treatment efficiency, the thickness of 105  $\mu\text{m}$  is the best choice with the treatment efficiency of 99.85% and the flux of 354.06  $\text{L}\cdot\text{m}^{-2}\cdot\text{h}^{-1}\cdot\text{bar}^{-1}$ .

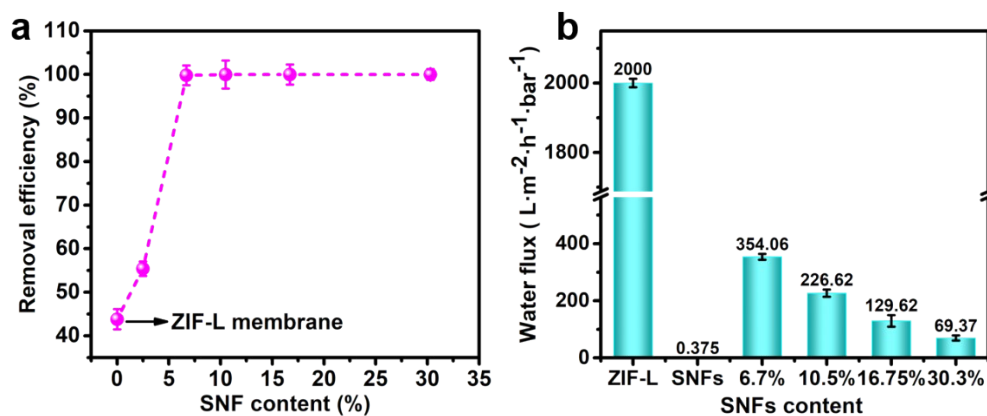

**Figure S17.** Under different SNFs content, the treatment efficiency (a) and water flux (b) of membrane for the removal of  $\text{Cu}^{2+}$  in wastewater.

## Contaminant Adsorption experiments

**Cu<sup>2+</sup> sorption kinetics.** Adsorption kinetic was performed at 25 °C. 10 mg SNFs-ZIF composite (SNFs: 6.7wt%) was added to a 100 mL beaker, which included 50 mL aqueous solution of Cu<sup>2+</sup> (20 mg·L<sup>-1</sup>). The mixture was shaken for 2 hours. The supernatant was taken out at different specific time periods and filtered. The concentration of Cu<sup>2+</sup> in aqueous solution was analyzed by ICP-MS. The distribution coefficient  $K_d$  is an important parameter to measure the performance of the adsorbents. The value of  $K_d$  can be determined by formula (1):

$$K_d = (C_i - C_f) / C_f \times (V/m) \quad (1)$$

where  $C_i$  indicates the initial concentration of the contaminant (mg·L<sup>-1</sup>),  $C_f$  indicates the final equilibrium concentration of the contaminant (mg·L<sup>-1</sup>),  $m$  is the mass of the adsorbent (g), and  $V$  is the volume of the tested liquid (mL).

The adsorbed amount for Cu<sup>2+</sup> ( $q_t$ ) was determined by the below equation (2):

$$q_t = (C_0 - C_t) / m \times V \quad (2)$$

where  $C_0$  and  $C_t$  are the concentration of the Cu<sup>2+</sup> (mg·L<sup>-1</sup>) initially and at time  $t$ , respectively,  $V$  is the volume solution used (L), and  $m$  is the mass of SNFs-ZIF (g).

**Mathematical Models.** The adsorption kinetics of pseudo-first-order rate equation and pseudo-second-order rate equation was used to investigate the adsorption process. The adsorption kinetic equations are given as Eq (3) and Eq (4), respectively.

$$\text{Log} (q_e - q_t) = \log q_e - k_1 t \quad (3)$$

$$t/q_t = 1/(k_2 q_e^2) + t/q_e \quad (4)$$

where  $q_e$  and  $q_t$  are the amount of  $\text{Cu}^{2+}$  adsorbed at equilibrium and time  $t$  (min), and  $k_1$  ( $\text{min}^{-1}$ ) and  $k_2$  ( $\text{g} \cdot \text{mg}^{-1} \cdot \text{min}^{-1}$ ) are the rate constant of the pseudo-first-order adsorption and the pseudo-second-order rate constant, respectively.<sup>3</sup>

**$\text{Cu}^{2+}$  adsorption isotherm.** The adsorption isotherm of Langmuir and Freundlich models was used to further understand the adsorption mechanism. The adsorption isotherm equations are given as Eq (5) and Eq (6), respectively.

$$C_e/q_e = 1/(k_L q_m) + C_e/q_m \quad (5)$$

$$\log q_e = \log K_f + (1/n) \log C_e \quad (6)$$

where  $q_e$  and  $q_m$  represent the equilibrium and the maximum adsorption capacity ( $\text{mg} \cdot \text{g}^{-1}$ ), respectively. Here,  $C_e$  is the  $\text{Cu}^{2+}$  concentration ( $\text{mg} \cdot \text{L}^{-1}$ ) at equilibrium, and  $K_L$  ( $\text{L} \cdot \text{mg}^{-1}$ ) is the Langmuir constant. Also,  $K_f$  ( $\text{L} \cdot \text{mg}^{-1}$ ) and  $n$  are the Freundlich parameters related to adsorption capacity and adsorption intensity, respectively.<sup>4</sup>

According to the above equations, conclusions can be drawn that:

(1) The  $K_d$  values of the SNFs-ZIF hybrid membrane for  $\text{Cu}^{2+}$  can reach  $2.28 \times 10^5$   $\text{mL} \cdot \text{g}^{-1}$ .

(2) The pseudo-second-order rate model and the Langmuir model were selected as the adsorption kinetic and the adsorption isotherm between  $\text{Cu}^{2+}$  and SNFs-ZIF composite.

(3) The adsorbed capacity of SNFs-ZIF for  $\text{Cu}^{2+}$  attained  $294 \text{ mg}\cdot\text{g}^{-1}$ .

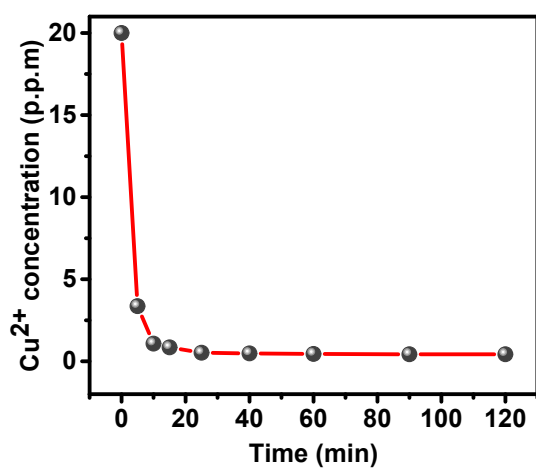

**Figure S18.** The concentration of  $\text{Cu}^{2+}$  in the solution decreased from  $20 \text{ mg}\cdot\text{L}^{-1}$  to  $0.85 \text{ mg}\cdot\text{L}^{-1}$  within 15 minutes when the membrane was used as adsorbent.

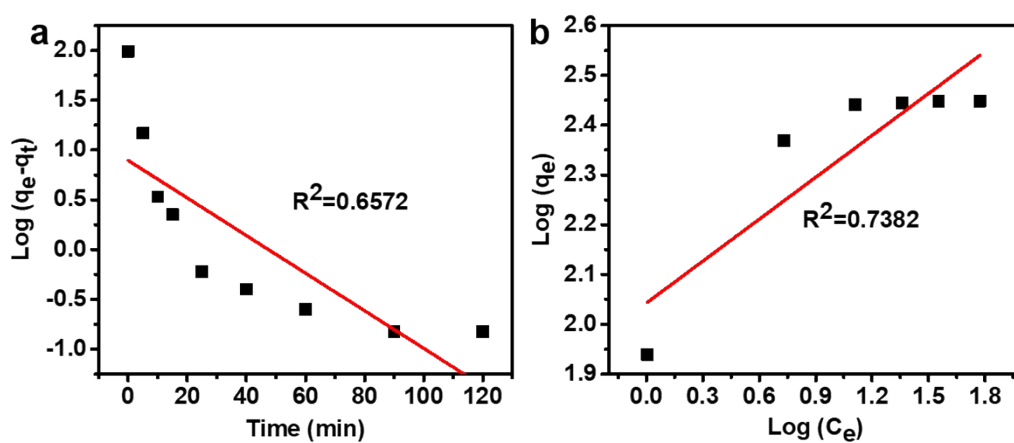

**Figure S19.** (a) Pseudo-first-order kinetic plot and (b) Freundlich isotherms for the adsorption mechanism between  $\text{Cu}^{2+}$  and SNFs-ZIF composite membranes ( $\text{Cu}^{2+}$  concentration:  $20 \text{ mg}\cdot\text{L}^{-1}$ ).

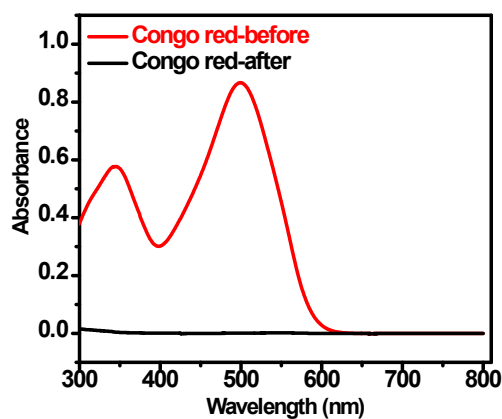

**Figure S20.** UV-visible spectra of 50 ppm (10 mL) Congo red solution before and after the treatment of SNFs-ZIF membrane.

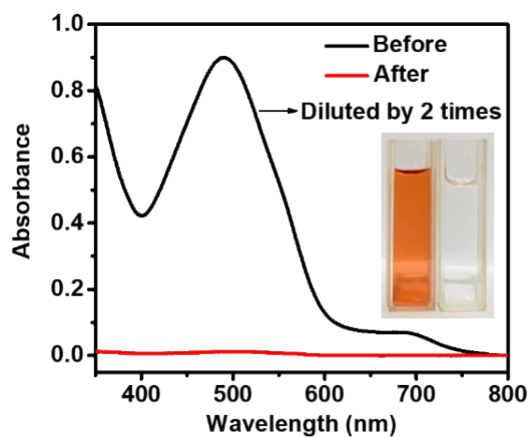

**Figure S21.** UV-visible spectra of 20 mL (each dyes concentration: 20 ppm) mixed solution filtered by SNFs-ZIF hybrid membranes.

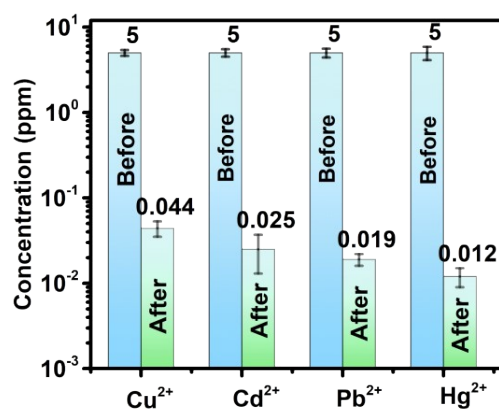

**Figure S22.** Concentration changes of multiple heavy metal ions in the mixed solution (co-existence of dyes and metal ions) before and after the filtration of SNFs-ZIF hybrid membranes.

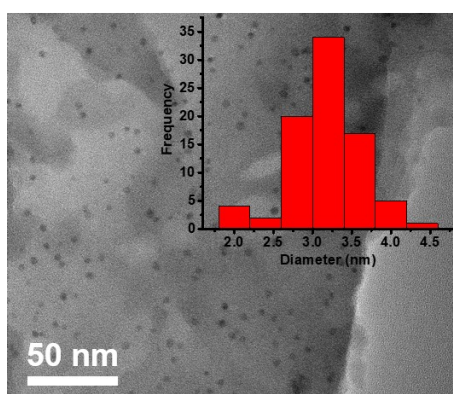

**Figure S23.** TEM images of Pd/CM, exhibiting the clearly visible Pd NPs on the carbonized SNFs-ZIF membrane substrate, after thermal reduction and cooling, and most of them are distributed in 2~3nm. Inset: size distribution of Pd nanoparticles.

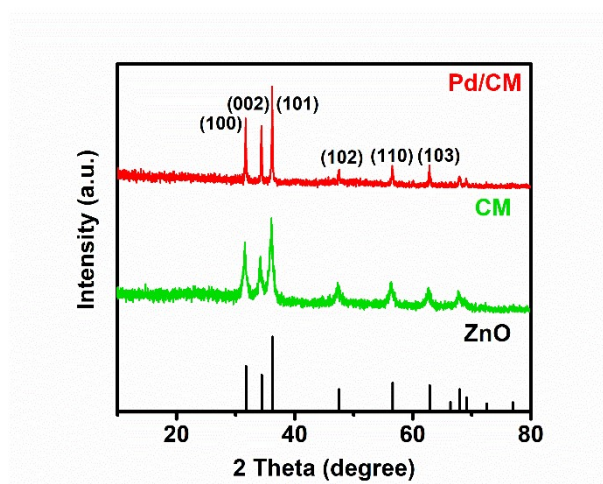

**Figure S24.** XRD spectra of the composite. Six typical diffraction peaks at  $2\theta$  of  $31.77^\circ$ ,  $34.42^\circ$ ,  $36.25^\circ$ ,  $47.53^\circ$ , and  $56.60^\circ$ ,  $62.86^\circ$  for the composite are indexed to (100), (002), (101), (102), (110) and (103) planes of ZnO (JCPDS 36-1451) crystal structure.<sup>5</sup>

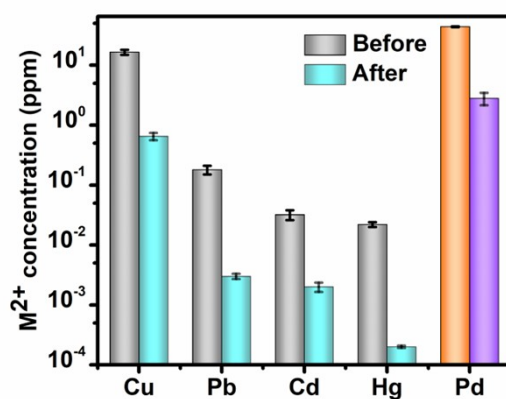

**Figure S25.** Concentration changes of multiple heavy metal ions and  $\text{Pd}^{2+}$  in actual wastewater before and after the filtration of SNFs-ZIF hybrid membranes.

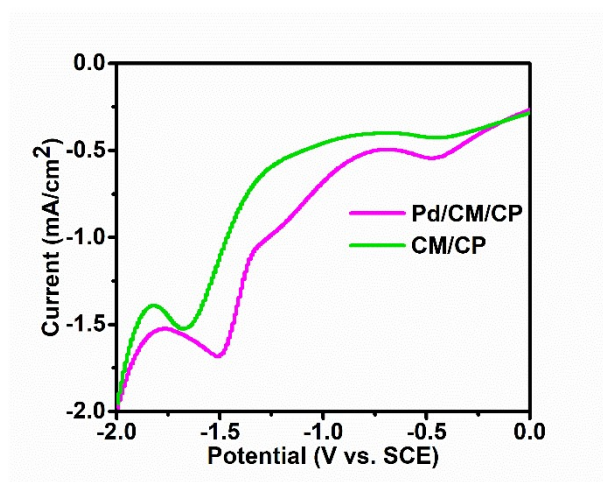

**Figure S26.** LSV curves on different cathodes. LSV tests at  $2 \text{ mV} \cdot \text{s}^{-1}$  scan rate were set in a potential ranging from  $-2.0 \text{ V (vs. SCE)}$  to  $2.0 \text{ V (vs. SCE)}$ .

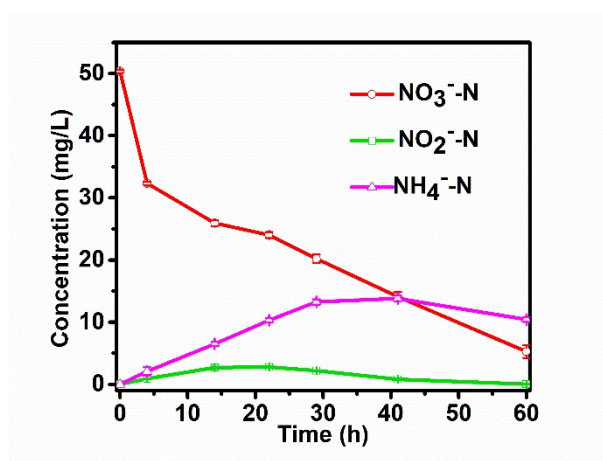

**Figure S27.** Time-variation concentrations of nitrate, nitrite, and ammonium ions. Experimental conditions:  $50 \text{ mg} \cdot \text{L}^{-1} \text{ NO}_3^- \text{-N}$ ,  $0.05 \text{ mol} \cdot \text{L}^{-1} \text{ Na}_2\text{SO}_4$ ,  $-1.3 \text{ V (vs. SCE)}$  of applied potential, 60 h.

**Table S1.** Performance comparison with reported relevant membrane.

| Membrane material                                                         | Water<br>permeance<br>( $\text{L}\cdot\text{m}^{-2}\cdot\text{h}^{-1}\cdot\text{bar}^{-1}$ ) | Feed<br>system   | Rejection<br>(%) | Ref. |
|---------------------------------------------------------------------------|----------------------------------------------------------------------------------------------|------------------|------------------|------|
| Poly(ionic liquid)/PSF NF                                                 | 7.55                                                                                         | $\text{Co}^{2+}$ | 85.2             | 6    |
|                                                                           |                                                                                              | $\text{Cu}^{2+}$ | 84.9             |      |
|                                                                           |                                                                                              | $\text{Ni}^{2+}$ | 88.4             |      |
| Poly(ethyleneimine)/poly(dopamine<br>)-MWCNTs/trimesoyl chloride NC<br>NF | 15.32                                                                                        | $\text{Zn}^{2+}$ | 93               | 7    |
|                                                                           |                                                                                              | $\text{Cu}^{2+}$ | 90.5             |      |
|                                                                           |                                                                                              | $\text{Ca}^{2+}$ | 90.5             |      |
| Polydopamine functionalized<br>halloysite nanotube-<br>polyetherimide MMM | 22.5                                                                                         | $\text{Pb}^{2+}$ | 78.5             | 8    |
|                                                                           |                                                                                              | $\text{Cd}^{2+}$ | 75.6             |      |
| Polyimide TFC FO                                                          | 2.4                                                                                          | $\text{Pb}^{2+}$ | 99.4             | 9    |
|                                                                           |                                                                                              | $\text{Cd}^{2+}$ | 99.9             |      |
|                                                                           |                                                                                              | $\text{Cu}^{2+}$ | 99.8             |      |
|                                                                           |                                                                                              | $\text{Hg}^{2+}$ | 99.8             |      |
| ZIF-300                                                                   | 39.2                                                                                         | $\text{Cu}^{2+}$ | 99.21            | 10   |
|                                                                           |                                                                                              | $\text{Cd}^{2+}$ | 99.32            |      |

|                                                    |       |                  |       |                  |
|----------------------------------------------------|-------|------------------|-------|------------------|
| ZnAl <sub>2</sub> O <sub>4</sub> -TiO <sub>2</sub> | 5.1   | Cd <sup>2+</sup> | 93    | 11               |
| ultrafiltration                                    |       | Pb <sup>2+</sup> | 93.4  |                  |
| membranes                                          |       | Cr <sup>2+</sup> | 96    |                  |
| Poly(piperazineamide)                              | 80    | Pb <sup>2+</sup> | > 99  | 12               |
| thin film                                          |       | Cd <sup>2+</sup> | 97    |                  |
|                                                    |       | Co <sup>2+</sup> | 96    |                  |
|                                                    |       | Cu <sup>2+</sup> | 99    |                  |
| <b>SNFs-ZIF membrane</b>                           | 354.1 | Cu <sup>2+</sup> | 99.85 | <b>This work</b> |
|                                                    |       | Cd <sup>2+</sup> | ≈100  |                  |
|                                                    |       | Pb <sup>2+</sup> | 99.94 |                  |
|                                                    |       | Hg <sup>2+</sup> | 99.92 |                  |

**Table S2.** Physicochemical properties of three dyes.

| Name           | Molecular formula                                                             | Molecular weight | Electricity |
|----------------|-------------------------------------------------------------------------------|------------------|-------------|
| Condo red      | C <sub>32</sub> H <sub>22</sub> N <sub>6</sub> Na <sub>2</sub> S <sub>2</sub> | 696              | negative    |
| Rhodamine B    | C <sub>28</sub> H <sub>31</sub> ClN <sub>2</sub> O <sub>3</sub>               | 479              | positive    |
| Methylene blue | C <sub>16</sub> H <sub>18</sub> ClN <sub>3</sub> S                            | 319              | positive    |

**Table S3.** Estimated total cost for preparing 1 g adsorbents.

| Adsorbent                                                     | Materials                                               | Amount<br>used | Unit<br>cost \$ | Cost<br>\$ | Total<br>cost<br>\$/g | Other<br>costs                                                   | Ref.   |
|---------------------------------------------------------------|---------------------------------------------------------|----------------|-----------------|------------|-----------------------|------------------------------------------------------------------|--------|
| TEMPO<br>oxidized CNC                                         | CNC                                                     | 1 g            | 0.3             | 0.3        | <b>2.8</b>            | Dialyzing<br>cellulose<br>dialysis<br>membran<br>e for 1<br>week | 13     |
|                                                               | TEMPO-reagent                                           | 0.059 g        | 0.57            | 0.33       |                       |                                                                  |        |
|                                                               | NaBr                                                    | 0.325 g        | 0.112           | 0.04       |                       |                                                                  |        |
|                                                               | NaClO                                                   | 7.1 mL         | 0.19            | 1.35       |                       |                                                                  |        |
|                                                               | Methanol                                                | 11 mL          | 0.063           | 0.7        |                       |                                                                  |        |
|                                                               | NaOH                                                    | N/A mL         | 0.008           | N/A        |                       |                                                                  |        |
|                                                               | HCl                                                     | N/A mL         | 0.01            | N/A        |                       |                                                                  |        |
| DNPH<br>modified $\gamma$ -<br>Al <sub>2</sub> O <sub>3</sub> | Alumina nanoparticles                                   | 2.0 g          | 9.175           | 18.35      | <b>9.4</b>            |                                                                  | 14     |
|                                                               | SDS                                                     | 0.1 g          | 1.62            | 0.16       |                       |                                                                  |        |
|                                                               | 2,4-dinitroph-<br>enylhydrazine                         | 0.9            | 1.572           | 1.41       |                       |                                                                  |        |
| ZnO                                                           | Zn(CH <sub>3</sub> COO) <sub>2</sub> •2H <sub>2</sub> O | 0.66 g         | 12.88           | 8.5        | <b>82.55</b>          | Heating at<br>160 °C<br>for<br>12 h                              | 15     |
|                                                               | Urea                                                    | 0.54 g         | 0.1542          | 0.08       |                       |                                                                  |        |
|                                                               | Ethylene glycol                                         | 25 mL          | 0.432           | 10.8       |                       |                                                                  |        |
| MWCNT                                                         | /                                                       | /              | /               | /          | <b>42.35</b>          |                                                                  | Sigma- |

|                   |                                       |          |       |       |              |          |                   |
|-------------------|---------------------------------------|----------|-------|-------|--------------|----------|-------------------|
|                   |                                       |          |       |       |              |          | Aldrich           |
| SWCNT             | /                                     | /        | /     | /     | <b>676</b>   |          | Sigma-            |
|                   |                                       |          |       |       |              |          | Aldrich           |
| Graphene<br>oxide | /                                     | /        | /     | /     | <b>2215</b>  |          | Sigma-<br>Aldrich |
| SNF/HAP           | Cocoons                               | 1 g      | 0.015 | 0.02  | <b>1.1</b>   | Degummi  | 16                |
|                   | LiBr                                  | 8.077 g  | 0.12  | 0.97  |              | ng and   |                   |
|                   | CaCl <sub>2</sub>                     | 0.133 g  | 0.343 | 0.05  |              | dialysis |                   |
|                   | Na <sub>2</sub> HPO <sub>4</sub>      | 0.17 g   | 0.39  | 0.07  |              |          |                   |
| MOF-              | 1,3,5-                                |          |       |       | >            |          | 17                |
| 808/PAN           | Benzenetricarboxylic<br>acid          | 0.7860 g | 1.159 | 0.911 | <b>80.99</b> |          |                   |
|                   | ZrOCl <sub>2</sub> ·8H <sub>2</sub> O | 1.209 g  | 14.32 | 17.31 |              |          |                   |
|                   | PAN                                   | 0.5 g    | 4.3   | 2.15  |              |          |                   |
|                   | DMF                                   | 160 mL   | 0.152 | 24.32 |              |          |                   |
|                   | Anhydrous formic<br>acid              | 150 mL   | 0.166 | 24.9  |              |          |                   |
|                   | EDTA-2Na                              | 18.60 g  | 2.817 | 52.39 |              |          |                   |
|                   | Organic solvents                      | /        | /     | /     |              |          |                   |
| SNFs-ZIF          | Cocoons                               | 1 g      | 0.04  | 0.44  | <b>1.98</b>  | Degummi  | <b>This</b>       |
|                   | LiBr                                  | 3.23 g   | 0.067 | 0.216 |              | ng and   | <b>work</b>       |

|                                                       |         |       |       |          |
|-------------------------------------------------------|---------|-------|-------|----------|
| Zn (NO <sub>3</sub> ) <sub>2</sub> •6H <sub>2</sub> O | 0.168 g | 4.551 | 0.764 | dialysis |
| 2-methylimidazole                                     | 0.26 g  | 0.321 | 0.08  |          |

---

## Reference

- (1) Q. Huo, J. Li, X. Qi, G. Liu, X. Zhang, B. Zhang, Y. Ning, Y. Fu, J. Liu and S. Liu, Cu, Zn-embedded MOF-derived bimetallic porous carbon for adsorption desulfurization. *Chem. Eng. J.*, 2019, **378**, 122106.
- (2) L. Zhou, N. Li, G. Owens and Z. Chen, Simultaneous removal of mixed contaminants, copper and norfloxacin, from aqueous solution by ZIF-8. *Chem. Eng. J.*, 2019, **362**, 628-637.
- (3) R. Guo, X. Cai, H. Liu, Z. Yang, Y. Meng, F. Chen, Y. Li and B. Wang, In Situ Growth of Metal-Organic Frameworks in Three-Dimensional Aligned Lumen Arrays of Wood for Rapid and Highly Efficient Organic Pollutant Removal. *Environ. Sci. Technol.*, 2019, **53**, 2705-2712.
- (4) I. Andjelkovic, D. N. Tran, S. Kabiri, S. Azari, M. Markovic and D. Losic, Graphene Aerogels Decorated with alpha-FeOOH Nanoparticles for Efficient Adsorption of Arsenic from Contaminated Waters. *ACS Appl. Mater. Interfaces*, 2015, **7**, 9758-9766.
- (5) M. T. Efa and T. Imae, Hybridization of carbon-dots with ZnO nanoparticles of different sizes. *J. Taiwan Inst. Chem. Eng.*, 2018, **92**, 112-117.
- (6) Y. Tang, B. Tang and P. Wu, Preparation of a positively charged nanofiltration membrane based on hydrophilic–hydrophobic transformation of a poly(ionic liquid). *J. Mater. Chem. A*, 2015, **3**, 12367-12376.
- (7) F. Y. Zhao, Y. L. Ji, X. D. Weng, Y. F. Mi, C. C. Ye, Q. F. An and C. J. Gao, High-Flux Positively Charged Nanocomposite Nanofiltration Membranes Filled with Poly(dopamine) Modified Multiwall Carbon Nanotubes. *ACS Appl. Mater. Interfaces*, 2016, **8**, 6693-6700.
- (8) R. S. Hebbar, A. M. Isloor, K. Ananda and A. F. Ismail, Fabrication of polydopamine functionalized halloysite nanotube/polyetherimide membranes for heavy metal removal. *J. Mater. Chem. A*, 2016, **4**, 764-774.
- (9) Y. Cui, Q. Ge, X.-Y. Liu and T.-S. Chung, Novel forward osmosis process to effectively remove

- heavy metal ions. *J. Membr. Sci.*, 2014, **467**, 188-194.
- (10) J. Yuan, W.-S. Hung, H. Zhu, K. Guan, Y. Ji, Y. Mao, G. Liu, K.-R. Lee and W. Jin, Fabrication of ZIF-300 membrane and its application for efficient removal of heavy metal ions from wastewater. *J. Membr. Sci.*, 2019, **572**, 20-27.
- (11) N. Saffaj, H. Loukili, S. Alami Younssi, A. Albizane, M. Bouhria, M. Persin and A. Larbot, Filtration of solution containing heavy metals and dyes by means of ultrafiltration membranes deposited on support made of Moroccan clay. *Desalination* 2004, **168**, 301-306.
- (12) A. Bera, J. S. Trivedi, S. B. Kumar, A. K. S. Chandel, S. Halder and S. K. Jewrajka, Anti-organic fouling and anti-biofouling poly(piperazineamide) thin film nanocomposite membranes for low pressure removal of heavy metal ions. *J. Hazard. Mater.*, 2018, **343**, 86-97.
- (13) S. Hokkanen, A. Bhatnagar and M. Sillanpaa, A review on modification methods to cellulose-based adsorbents to improve adsorption capacity. *Water Res.*, 2016, **91**, 156-173.
- (14) X. Pu, Z. Jiang, B. Hu and H. Wang,  $\gamma$ -MPTMS modified nanometer-sized alumina micro-column separation and preconcentration of trace amounts of Hg, Cu, Au and Pd in biological, environmental and geological samples and their determination by inductively coupled plasma mass spectrometry. *J. Anal. At. Spectrom.*, 2004, **19**, 984-989. (15) X. Wang, W. Cai, Y. Lin, G. Wang and C. Liang, *J. Mater. Chem.*, 2010, **20**, 8582-8590.
- (16) S. J. Ling, G. Qin, W. W. Huang, S.F. Cao, D. L. Kaplan and Markus B. J., Design and function of biomimetic multilayer water purification membranes. *Sci. Adv.*, 2017, **3**, 1-11.
- (17) X. Chen, D. Chen, N. Li, Q. Xu, H. Li, J. He and J. Lu, Modified-MOF-808-Loaded Polyacrylonitrile Membrane for Highly Efficient, Simultaneous Emulsion Separation and Heavy Metal Ion Removal. *ACS Appl. Mater. Interfaces*, 2020, **12**, 39227-39235.
